# Supplementary material for: Comprehensive Analysis of Combinatorial Pharmacological Treatments to Correct Nonsense Mutations in the CFTR Gene
Source: MDPI journal article supplement (doi:10.3390/ijms222111972), 2021-11-04
Supplement: s1 [file s1]

SUPPLEMENTARY FIGURES

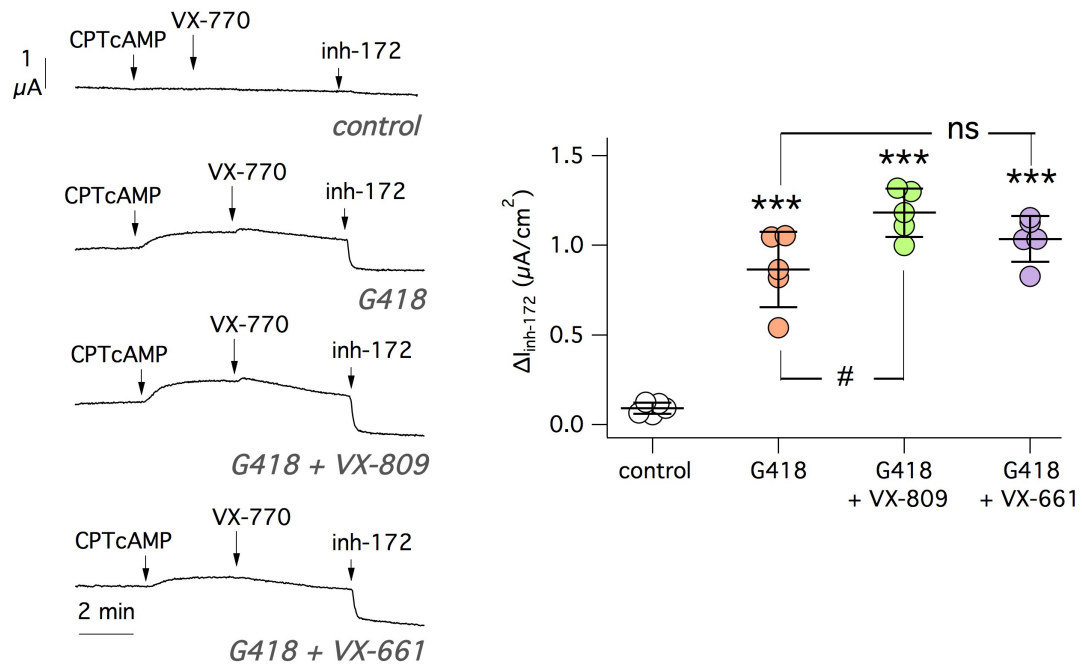

**Figure S1. Analysis of G542X-CFTR rescue by VX-809 or VX-661.** Representative traces (left) and summary of data (right) from short-circuit current experiments done on 16HBE14o-cells expressing G542X-CFTR. Cells were treated for 24 hours with G418 (0.5 mg/ml), with/without VX-809 (1  $\mu M$ ) or VX-661 (5  $\mu M$ ). \*\*\*,  $p < 0.001$  vs. control; #,  $p < 0.05$  vs. G418; ns, not significant.

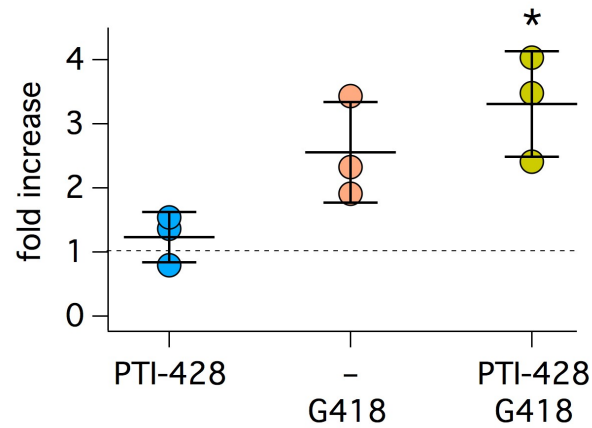

**Figure S2. Quantitative analysis of CFTR mRNA.** 16HBE14o- cells expressing G542X-CFTR were treated for 24 hours with PTI-428 (30  $\mu$ M), G418 (0.5 mg/ml) or both compounds. After treatment, RNA was extracted, converted to cDNA, and CFTR transcript quantified by real time RT-PCR. Results in each sample were normalized to B2M expression. The scatter dot-plot shows CFTR transcripts fold-change relative to control condition. \*,  $p < 0.05$  vs. vehicle treated cells (dashed line).

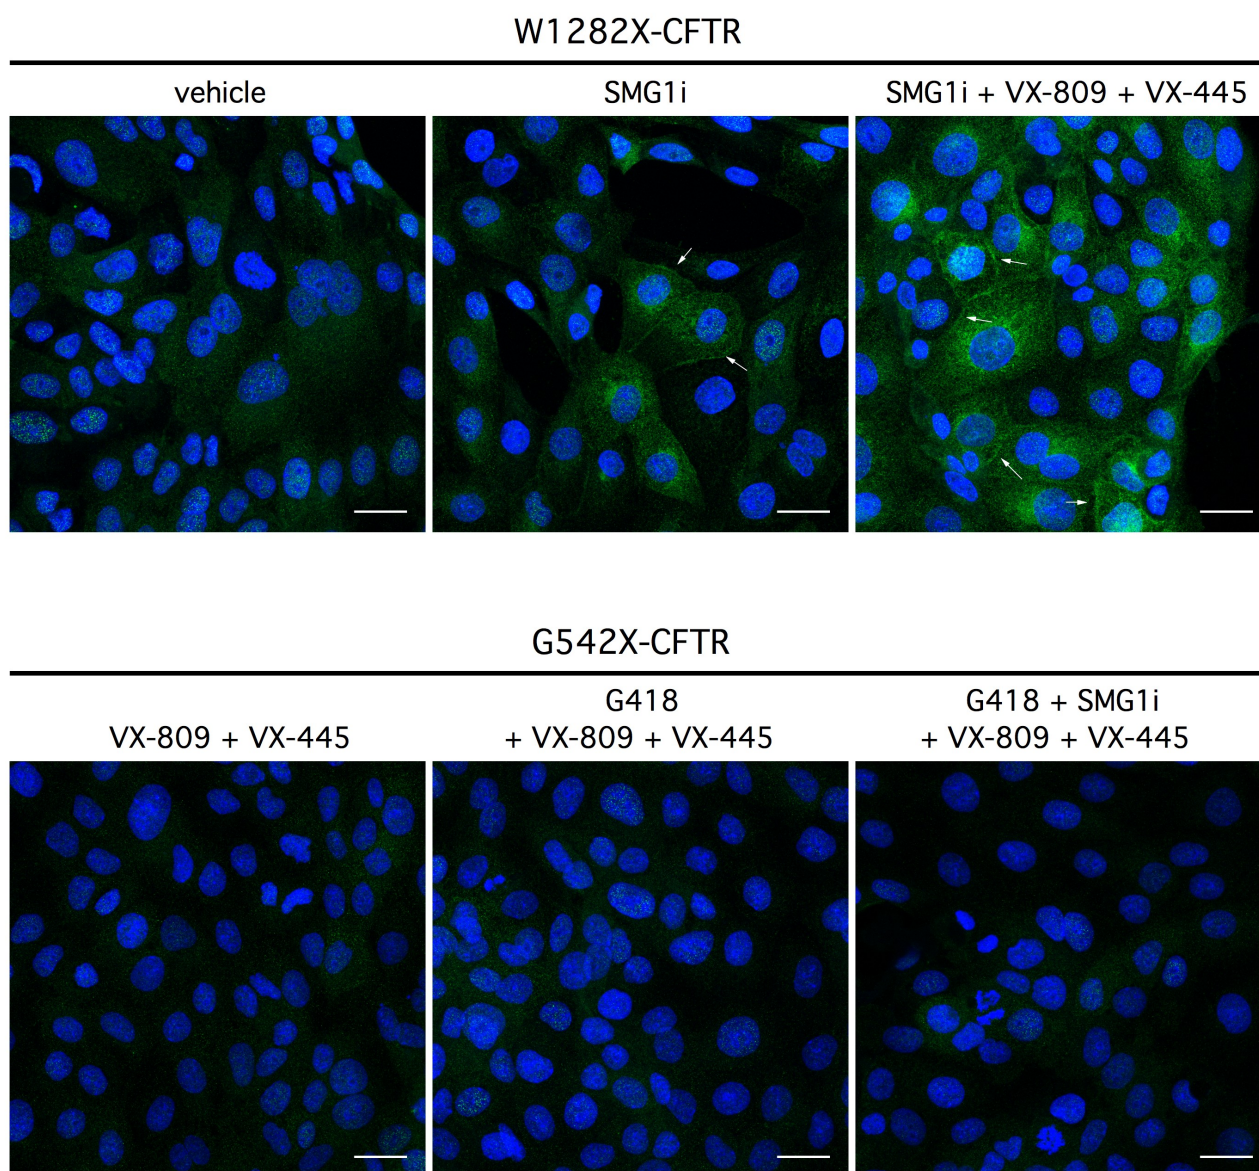

**Figure S3. Immunofluorescence analysis of CFTR rescue.** Representative images from W1282X- and G542X-CFTR cells treated with SMG1i (1  $\mu$ M) alone or in combination with VX-809 (1  $\mu$ M) plus VX-445 (5  $\mu$ M). Cells expressing the W1282X mutant show appearance of immunoreactive CFTR (green) following pharmacological treatment. Arrows: appearance of CFTR signal at cell borders. Scale bar: 20  $\mu$ m.

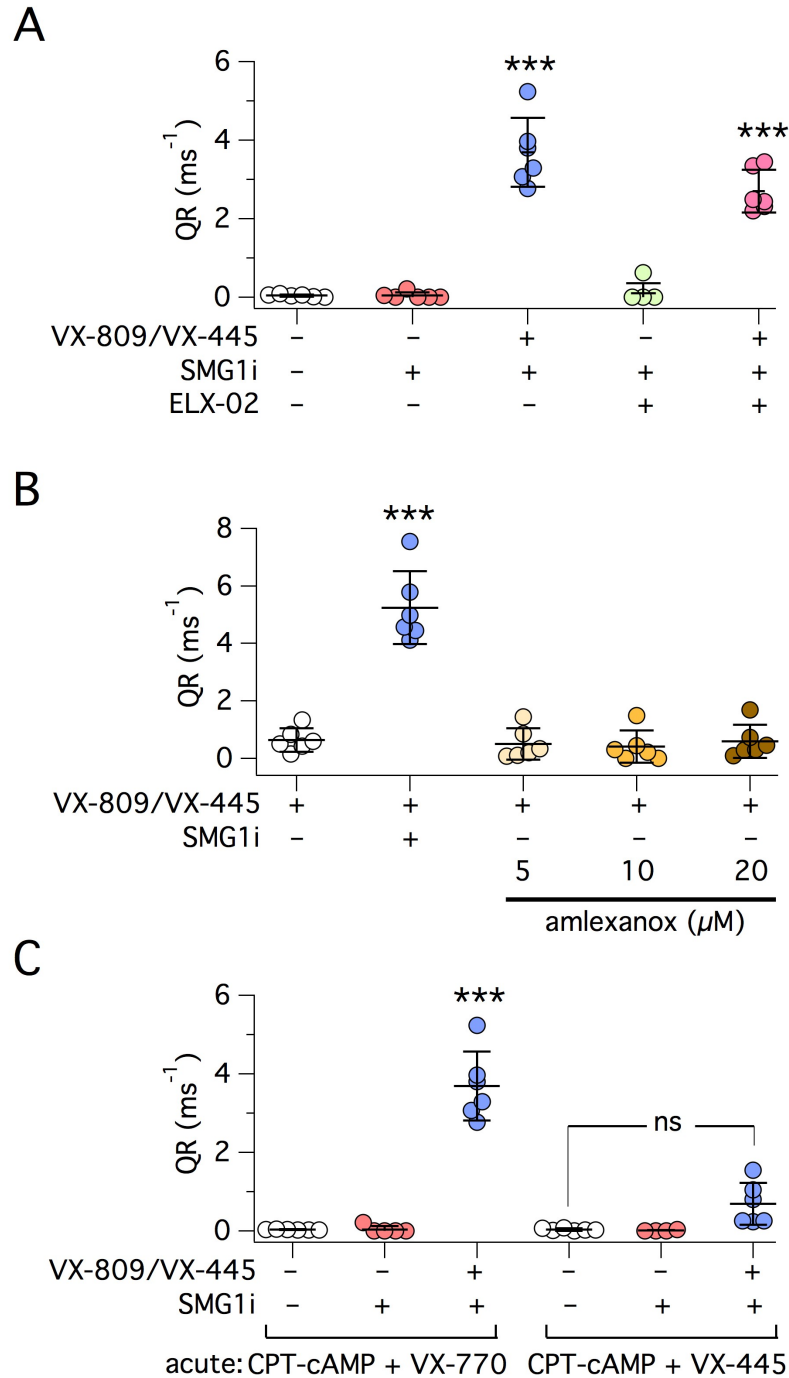

**Figure S4. Evaluation of W1282X-CFTR function with the HS-YFP.** (A) Evaluation of W1282X-CFTR rescue by SMG1i alone or in combination with ELX-02 with/without VX-809 (1  $\mu\text{M}$ ) and VX-445 (5  $\mu\text{M}$ ). After treatment, W1282X-CFTR activity was determined with the HS-YFP assay. \*\*\*,  $p < 0.001$  vs. control. (B) Evaluation of amlexanox as a NMD inhibitor. Cells were treated for 24 hrs with VX-809 (1  $\mu\text{M}$ ) plus VX-445 (5  $\mu\text{M}$ ), with/without amlexanox (5-10-20  $\mu\text{M}$ ) or SMG1i (1  $\mu\text{M}$ ). In contrast to SMG1i, amlexanox was ineffective. \*\*\*,  $p < 0.001$  vs. correctors alone. (C) Evaluation of VX-445 as a CFTR potentiator. Cells were treated for 24 hours with vehicle or SMG1i (1  $\mu\text{M}$ ) plus/minus VX-809 (1  $\mu\text{M}$ ) and VX-445 (5  $\mu\text{M}$ ). After treatment, cells were acutely stimulated with CPT-cAMP (100  $\mu\text{M}$ ) plus VX-770 (1  $\mu\text{M}$ ) or VX-445 (5  $\mu\text{M}$ ). \*\*\*,  $p < 0.001$  vs. vehicle.
